# Supplementary material for: Feasibility of a Home-Based Tablet App for Dexterity Training in Multiple Sclerosis: Usability Study
Source: PubMed Central journal article supplement (PMC7312262; doi:10.2196/18204), 2020-06-09
Supplement: mhealth_v8i6e18204_app1.pdf [file mhealth_v8i6e18204_app1.pdf]

# Custom User Engagement Questionnaire

Pat. ID: \_\_\_\_\_

Date: \_\_\_\_\_

**Thank you for your evaluation**

## 1. Content of the app

|                                                                             | Poor | Fair | Good | Very good | Excellent |
|-----------------------------------------------------------------------------|------|------|------|-----------|-----------|
| 1. Were the exercises fun to play?                                          |      |      |      |           |           |
| 2. Have you improved your fine motor skills?                                |      |      |      |           |           |
| 3. Was it easy to integrate the exercises into daily life?                  |      |      |      |           |           |
| 4. Were the explanations for the execution of each exercise sufficient?     |      |      |      |           |           |
| 5. Would you recommend this application?                                    |      |      |      |           |           |
| 6. Can you take the tablet well and easily on the go?                       |      |      |      |           |           |
| 7. Do you notice improvements in everyday life regarding fine motor skills? |      |      |      |           |           |

## 2. Overall score

(please tick one number)

|           |   |   |   |   |   |   |   |   |   |    |           |
|-----------|---|---|---|---|---|---|---|---|---|----|-----------|
| Very poor | 1 | 2 | 3 | 4 | 5 | 6 | 7 | 8 | 9 | 10 | Excellent |
|-----------|---|---|---|---|---|---|---|---|---|----|-----------|

Do you have any suggestions for improvement, further ideas for exercises?

\_\_\_\_\_

\_\_\_\_\_

Further comments:

\_\_\_\_\_

\_\_\_\_\_
